# Supplementary material for: The Hidden Side of Complement Regulator C4BP: Dissection and Evaluation of Its Immunomodulatory Activity
Source: PubMed Central journal article supplement (PMC9084231; doi:10.3389/fimmu.2022.883743), 2022-04-25
Supplement: DataSheet_1.pdf [file DataSheet_1.pdf]

## Supplementary Material

### 1 Supplementary Figures and Tables

#### 1.1 Supplementary Figures

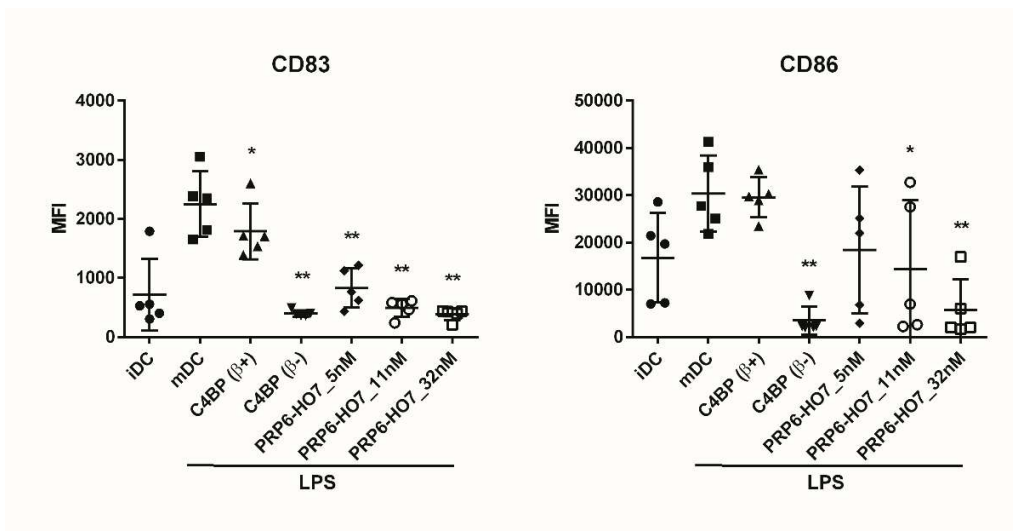

**Supplementary Figure 1.- PRP6-HO7 downregulates CD83 and CD86 expression in LPS-activated Mo-DCs grown in 50% human serum.**

Human Mo-DCs were grown in RPMI 1640 cell culture medium supplemented with 50% heat-inactivated autologous serum and incubated throughout their differentiation process with C4BP(β+) and C4BP(β-) (both at 12 nM), and with the indicated concentrations of PRP6-HO7. DC maturation was achieved by LPS treatment. Cells were then collected, washed, and analyzed by flow cytometry for cell surface expression of CD83 and CD86. MFI, median fluorescence intensity for the different surface markers. iDC, untreated, immature DCs; mDC, untreated, LPS-matured DCs. The results shown are the mean ± SD from 5 independent donors (\*,  $p < 0.05$ ; \*\*,  $p < 0.01$  compared with mDC).

(I)

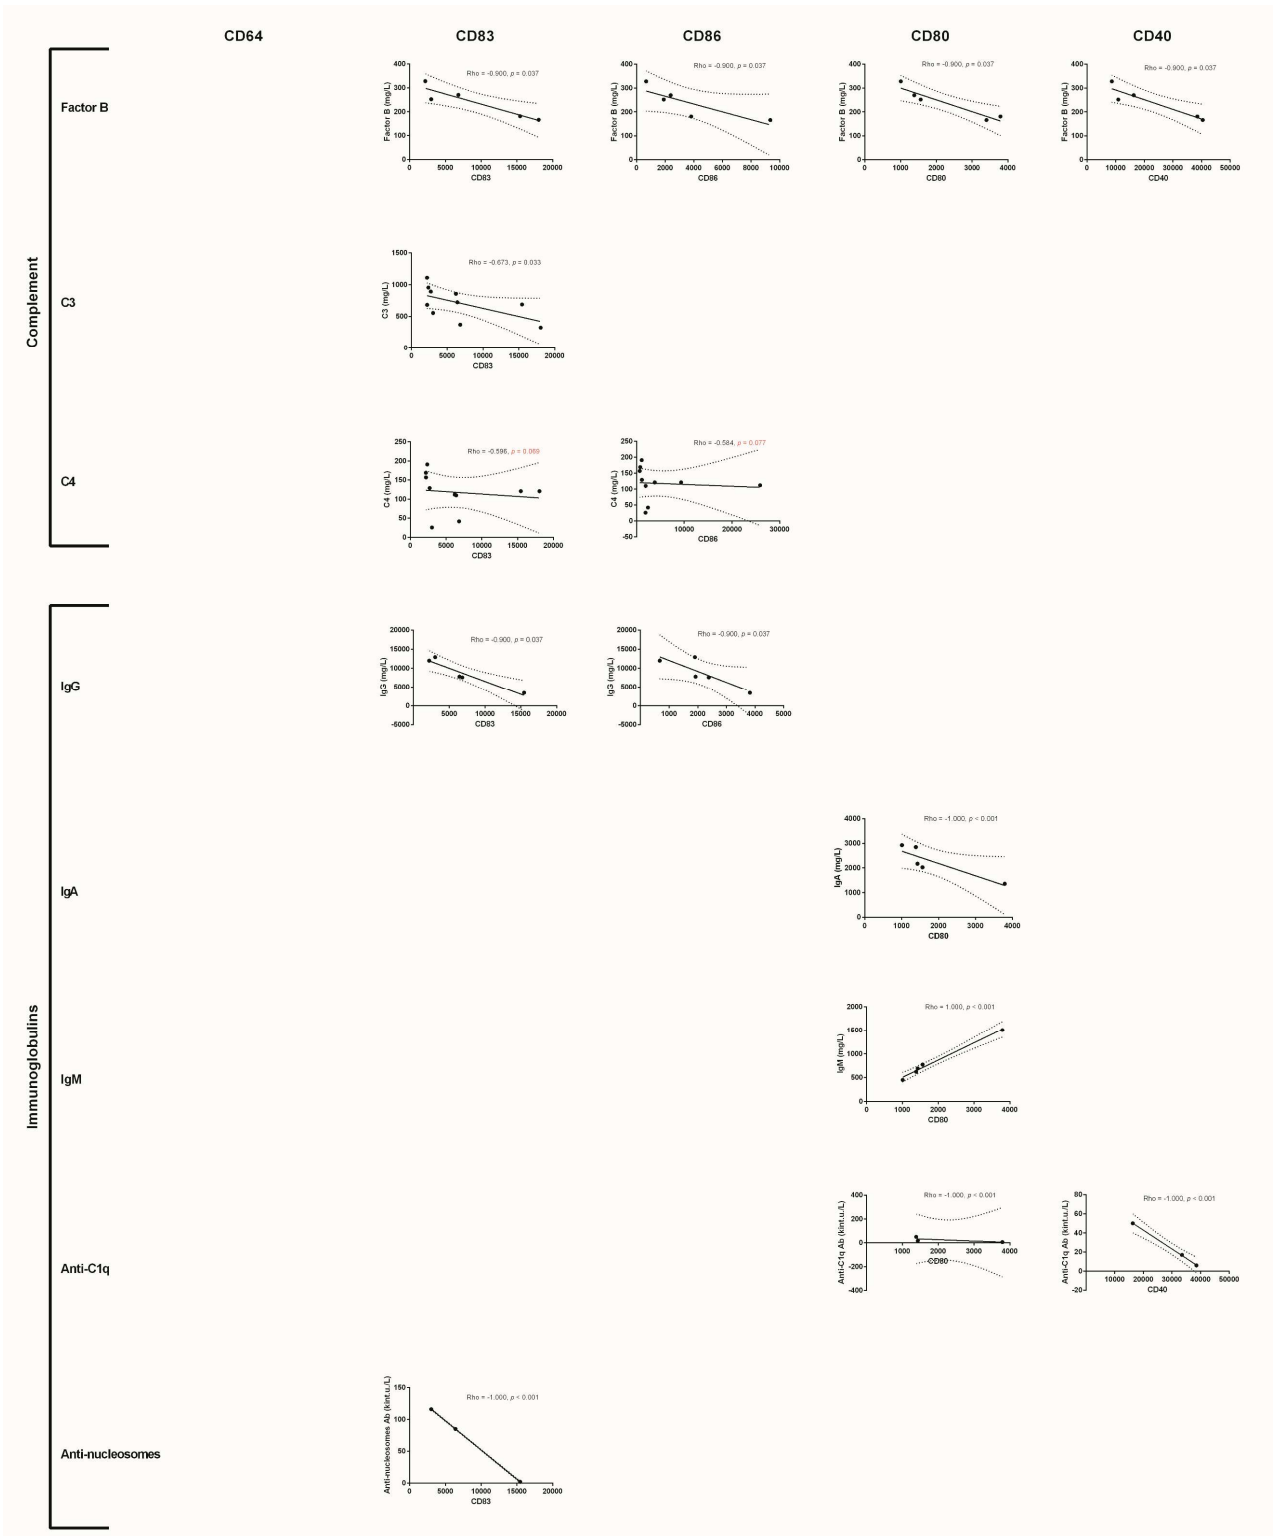

(II)

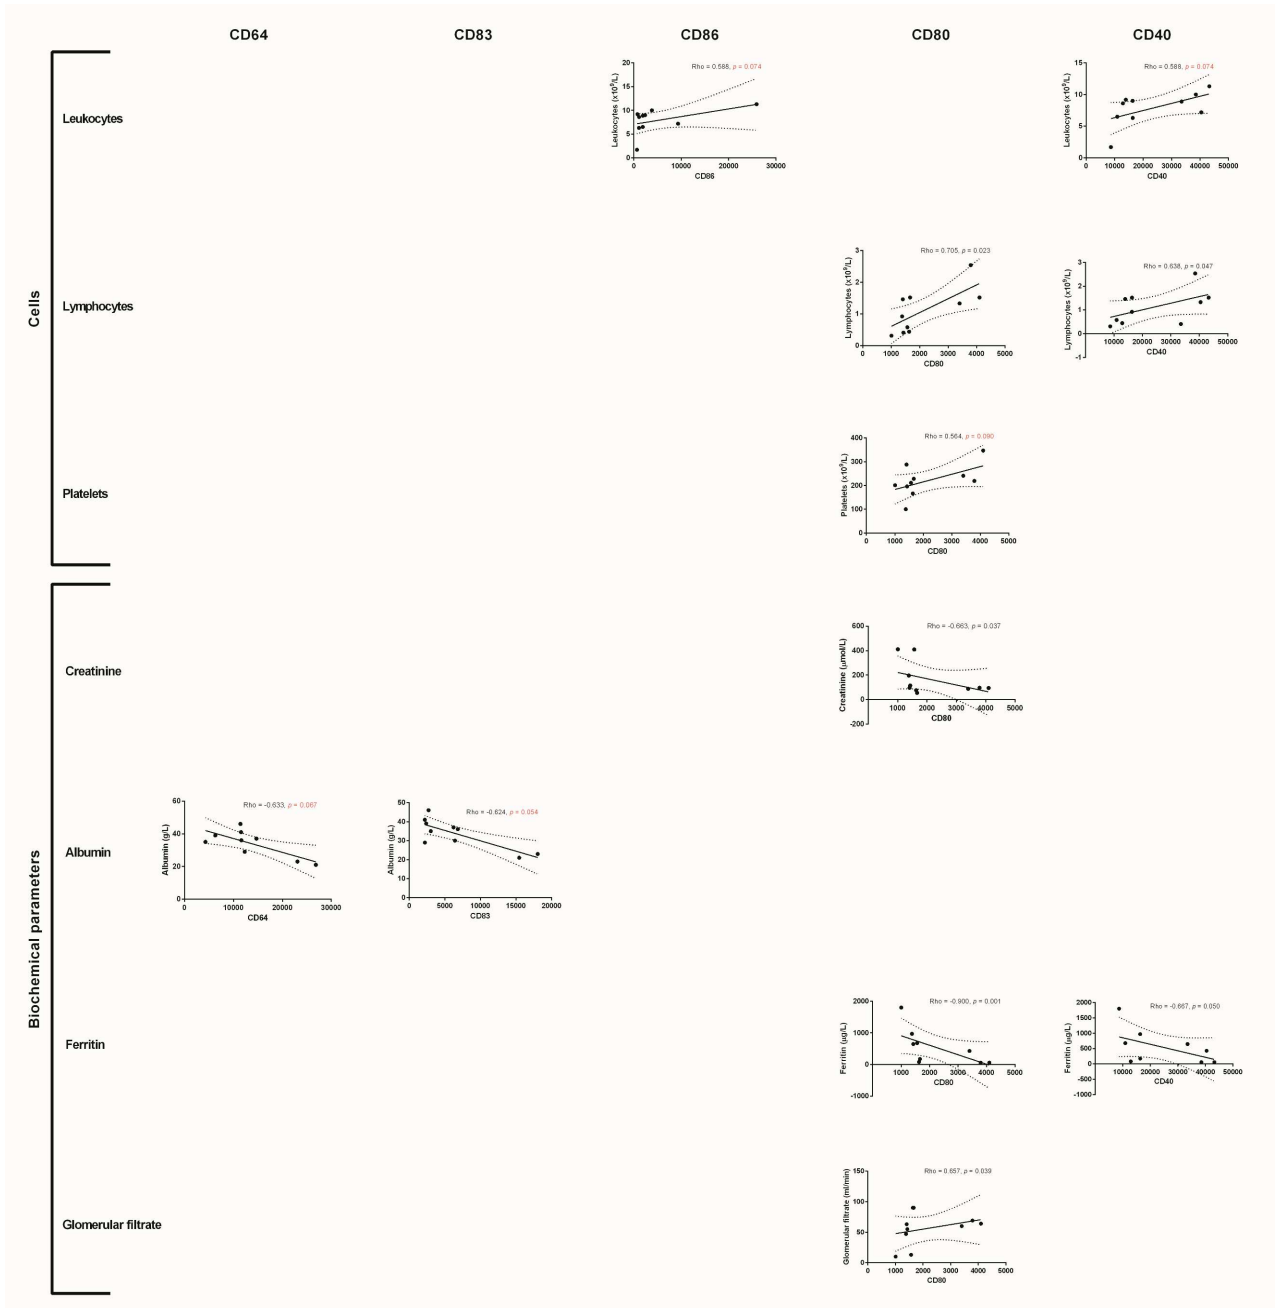

Supplementary Figure 2.- Surface marker expression on Mo-DCs and Mo-macrophages correlate with clinical features of lupus nephritis disease activity in SLE patients.

Matrix-type image showing the correlations found between the surface markers analyzed (CD64, CD83, CD86, CD80, and CD40) and clinical data gathered from cohort 2 SLE patients, including: **(I)** complement components (Factor B, C3, C4) and immunoglobulins (IgG, IgA, IgM, anti-C1q antibodies, anti-nucleosomes antibodies), and **(II)** blood cells (leukocytes, lymphocytes, platelets), and biochemical parameters (serum creatinine, serum albumin, serum ferritin, glomerular filtrate). Both correlation coefficients and p values (in red whether approaching significance) are highlighted for each of the correlations.

## 1.2 Supplementary Tables

**Supplementary Table 1.- Main clinical characteristics of SLE patient cohort 1**

| Patient characteristics             | Total n | mean / n | ±SD / % |
|-------------------------------------|---------|----------|---------|
| Age (years)                         | 11      | 47.3     | 13.5    |
| Sex (% Female)                      | 11      | 8        | 72.7    |
| Smoking                             | 11      | 6        | 54.5    |
| Dyslipidemia                        | 11      | 6        | 54.5    |
| Hypertension                        | 11      | 4        | 36.4    |
| Diabetes mellitus II                | 11      | 0        | 0       |
| SLEDAI                              | 11      | 16.8     | 10.2    |
| Lupus nephritis                     | 11      | 9        | 81.8    |
| Flare                               | 11      | 8        | 72.7    |
| Erythrocytes (x10 <sup>12</sup> /L) | 11      | 3.8      | 0.7     |
| Hemoglobin (g/L)                    | 11      | 114.2    | 22.3    |
| Platelets (x10 <sup>9</sup> /L)     | 11      | 268.5    | 125.8   |
| Leukocytes (x10 <sup>9</sup> /L)    | 11      | 6.7      | 3.2     |
| Lymphocytes (x10 <sup>9</sup> /L)   | 11      | 0.9      | 0.5     |
| Monocytes (x10 <sup>9</sup> /L)     | 11      | 0.5      | 0.3     |
| Urea (mmol/L)                       | 7       | 13.4     | 8.4     |
| Creatinine (µmol/L)                 | 11      | 160.1    | 141.4   |
| Glomerular filtration rate (ml/min) | 11      | 59.5     | 31.7    |
| Albumin (g/L)                       | 11      | 34.7     | 7.2     |
| Ferritin (µg/L)                     | 10      | 475.2    | 530.2   |
| C- reactive protein (mg/L)          | 11      | 17.2     | 32.6    |
| Proteinuria (g/24h)                 | 7       | 1.9      | 2.4     |
| Protein/Creatinine (g/mol)          | 3       | 347.5    | 330     |
| Hematuria (erythrocytes/µl)         | 8       | 191.9    | 508.1   |
| IgG (mg/L)                          | 4       | 10460    | 2394.7  |
| IgA (mg/L)                          | 4       | 2931.3   | 1179.7  |
| IgM (mg/L)                          | 4       | 547      | 228.6   |
| C3 (mg/L)                           | 11      | 736      | 242.5   |
| C4 (mg/L)                           | 11      | 107.6    | 57.4    |
| Factor B (mg/L)                     | 3       | 273      | 48.1    |

|                                 |    |       |       |
|---------------------------------|----|-------|-------|
| Anti ss-DNA Ab (kint.u./L)      | 11 | 417.2 | 610.9 |
| Anti-nucleosomes Ab (kint.u./L) | 4  | 92.5  | 51    |
| Anti-C1q Ab (kint.u./L)         | 2  | 9.5   | 10.6  |
| Anti-SS-A Ab (Ro60) (CU)        | 6  | 239.8 | 556.2 |
| Anti-SS-A Ab (Ro52) (CU)        | 6  | 49.8  | 75.9  |
| Anti-SS-B Ab (La) (CU)          | 5  | 3.3   | 0     |
| Anti-RNP Ab (U1) (CU)           | 6  | 51.6  | 112.5 |
| Anti-Sm Ab (CLIA) (CU)          | 6  | 14.4  | 18    |
| Immunosuppressant treatment     | 11 | 7     | 63.6  |
| Hydroxychloroquine treatment    | 11 | 6     | 54.5  |
| JAK Inh treatment               | 11 | 0     | 0     |
| BAFF Inh treatment              | 11 | 2     | 18.2  |
| Steroid/Corticoid treatment     | 11 | 8     | 72.7  |
| Vitamin D treatment             | 11 | 4     | 36.4  |

**Supplementary Table 2.- Main clinical characteristics of SLE patient cohort 2**

| Patient characteristics             | Total n | mean / n | ±SD / % |
|-------------------------------------|---------|----------|---------|
| Age (years)                         | 10      | 48.8     | 14.8    |
| Sex (% Female)                      | 10      | 7        | 70      |
| Smoking                             | 10      | 4        | 40      |
| Dyslipidemia                        | 10      | 6        | 60      |
| Hypertension                        | 10      | 3        | 30      |
| Diabetes mellitus II                | 10      | 1        | 10      |
| SLEDAI                              | 10      | 19       | 10.5    |
| Lupus nephritis                     | 10      | 8        | 80      |
| Flare                               | 10      | 8        | 80      |
| Erythrocytes (x10 <sup>12</sup> /L) | 10      | 3.8      | 0.6     |
| Hemoglobin (g/L)                    | 10      | 115.9    | 17      |
| Platelets (x10 <sup>9</sup> /L)     | 10      | 219.7    | 66.3    |
| Leukocytes (x10 <sup>9</sup> /L)    | 10      | 7.9      | 2.7     |
| Lymphocytes (x10 <sup>9</sup> /L)   | 10      | 1.1      | 0.7     |
| Monocytes (x10 <sup>9</sup> /L)     | 10      | 0.6      | 0.3     |
| Urea (mmol/L)                       | 7       | 11.5     | 5.9     |
| Creatinine (µmol/L)                 | 10      | 163.7    | 134.9   |
| Glomerular filtration rate (ml/min) | 10      | 56.1     | 27.2    |
| Albumin (g/L)                       | 10      | 33.7     | 7.9     |
| Ferritin (µg/L)                     | 9       | 544.5    | 573.3   |
| C- reactive protein (mg/L)          | 10      | 14.5     | 34.4    |
| Proteinuria (g/24h)                 | 5       | 0.7      | 0.6     |
| Protein/Creatinine (g/mol)          | 5       | 308.1    | 259.4   |
| Hematuria (erythrocytes/µl)         | 8       | 232.9    | 495.2   |
| IgG (mg/L)                          | 5       | 8741     | 3833.3  |
| IgA (mg/L)                          | 5       | 2266.6   | 643.7   |
| IgM (mg/L)                          | 5       | 809.4    | 408.1   |
| C3 (mg/L)                           | 10      | 717.1    | 249.8   |
| C4 (mg/L)                           | 10      | 117.8    | 51.6    |
| Factor B (mg/L)                     | 5       | 239.4    | 66.6    |
| Anti ss-DNA Ab (kint.u./L)          | 10      | 98.1     | 102.6   |
| Anti-nucleosomes Ab (kint.u./L)     | 3       | 67.7     | 58.9    |
| Anti-C1q Ab (kint.u./L)             | 3       | 24.3     | 22.9    |
| Anti-SS-A Ab (Ro60) (CU)            | 6       | 236.8    | 557.6   |
| Anti-SS-A Ab (Ro52) (CU)            | 6       | 55.8     | 72.5    |
| Anti-SS-B Ab (La) (CU)              | 5       | 3.3      | 0       |
| Anti-RNP Ab (U1) (CU)               | 6       | 49.8     | 113.3   |
| Anti-Sm Ab (CLIA) (CU)              | 6       | 3.3      | 0       |

|                              |    |   |    |
|------------------------------|----|---|----|
| Immunosuppressant treatment  | 10 | 5 | 50 |
| Hydroxychloroquine treatment | 10 | 6 | 60 |
| JAK Inh treatment            | 10 | 1 | 10 |
| BAFF Inh treatment           | 10 | 0 | 0  |
| Steroid/Corticoid treatment  | 10 | 8 | 80 |
| Vitamin D treatment          | 10 | 3 | 30 |
